# Supplementary material for: Multiple-level validation identifies PARK2 in the development of lung cancer and chronic obstructive pulmonary disease
Source: PubMed Central journal article supplement (PMC5190090; doi:10.18632/oncotarget.9954), 2016-06-13
Supplement: oncotarget-07-44211-s002.pdf [file oncotarget-07-44211-s002.pdf]

# Supplementary Table 1

**Supplementary Table 1.** PARK2 mutants in human lung cancer. 46 Parkin mutations in cBioPortal (<http://www.cbioportal.org/>).

|                                    | Cancer Study                          | AA change                     | Type            | Copy #     | COSMIC | Mutation Assessor | Allele Freq (T) | # Mut in Sample |
|------------------------------------|---------------------------------------|-------------------------------|-----------------|------------|--------|-------------------|-----------------|-----------------|
| <a href="#">LUAD-S01467</a>        | <a href="#">Lung adeno (Broad)</a>    | <a href="#">R156*3D</a>       | <b>Nonsense</b> | Diploid    | 1      |                   | NA              | 279             |
| <a href="#">LUAD-B02594</a>        | <a href="#">Lung adeno (Broad)</a>    | <a href="#">X179_splice3D</a> | <b>Splice</b>   | Diploid    |        |                   | NA              | 634             |
| <a href="#">LUAD-GU4I3</a>         | <a href="#">Lung adeno (Broad)</a>    | <a href="#">G336F3D</a>       | <b>Missense</b> | Diploid    |        |                   | NA              | 39              |
| <a href="#">LUAD-CHTN-MAD06...</a> | <a href="#">Lung adeno (Broad)</a>    | <a href="#">H373D3D</a>       | <b>Missense</b> | Diploid    | 1      | <b>Medium</b>     | NA              | 92              |
| <a href="#">LUAD-B00915</a>        | <a href="#">Lung adeno (Broad)</a>    | <a href="#">C449F3D</a>       | <b>Missense</b> | Diploid    | 1      | <b>High</b>       | NA              | 440             |
| <a href="#">WA7899</a>             | <a href="#">LUAD (MSKCC)</a>          | <a href="#">V43L3D</a>        | <b>Missense</b> | NA         |        | Neutral           | 0.08            | 122             |
| <a href="#">TCGA-78-7159-01</a>    | <a href="#">Lung adeno (TCGA pub)</a> | <a href="#">A138P</a>         | <b>Missense</b> | ShallowDel | 1      | <b>Low</b>        | 0.18            | 258             |
| <a href="#">TCGA-05-4410-01</a>    | <a href="#">Lung adeno (TCGA pub)</a> | <a href="#">G213V3D</a>       | <b>Missense</b> | Diploid    | 1      | <b>Low</b>        | 0.22            | 982             |
| <a href="#">TCGA-44-7670-01</a>    | <a href="#">Lung adeno (TCGA pub)</a> | <a href="#">R275P3D</a>       | <b>Missense</b> | ShallowDel | 3      | <b>Medium</b>     | 0.35            | 941             |
| <a href="#">TCGA-78-7155-01</a>    | <a href="#">Lung adeno (TCGA pub)</a> | <a href="#">E322*3D</a>       | <b>Nonsense</b> | Diploid    | 1      |                   | 0.27            | 1340            |
| <a href="#">TCGA-64-5775-01</a>    | <a href="#">Lung adeno (TCGA pub)</a> | <a href="#">P343Q3D</a>       | <b>Missense</b> | ShallowDel | 3      | <b>Medium</b>     | 0.74            | 402             |
| <a href="#">TCGA-55-7907-01</a>    | <a href="#">Lung adeno (TCGA pub)</a> | <a href="#">E353*3D</a>       | <b>Nonsense</b> | Diploid    | 1      |                   | 0.3             | 963             |
| <a href="#">TCGA-05-4410-01</a>    | <a href="#">Lung adeno (TCGA pub)</a> | <a href="#">G354R3D</a>       | <b>Missense</b> | Diploid    | 1      | Neutral           | 0.22            | 982             |
| <a href="#">TCGA-49-4501-01</a>    | <a href="#">Lung adeno (TCGA pub)</a> | <a href="#">X429_splice3D</a> | <b>Splice</b>   | Diploid    |        |                   | 0.1             | 72              |
| <a href="#">TCGA-05-4390-01</a>    | <a href="#">Lung adeno (TCGA pub)</a> | <a href="#">W453L3D</a>       | <b>Missense</b> | ShallowDel | 1      | <b>Low</b>        | 0.16            | 495             |
| <a href="#">TCGA-49-4501-01</a>    | <a href="#">Lung adeno (TCGA)</a>     | <a href="#">MUTATED</a>       | <b>Splice</b>   | Diploid    |        |                   | 0.1             | 72              |
| <a href="#">TCGA-78-7159-01</a>    | <a href="#">Lung adeno (TCGA)</a>     | <a href="#">A138P</a>         | <b>Missense</b> | ShallowDel | 1      | <b>Low</b>        | 0.18            | 258             |
| <a href="#">TCGA-05-4410-01</a>    | <a href="#">Lung adeno (TCGA)</a>     | <a href="#">G213V3D</a>       | <b>Missense</b> | Diploid    | 1      | <b>Low</b>        | 0.22            | 982             |
| <a href="#">TCGA-44-7670-01</a>    | <a href="#">Lung adeno (TCGA)</a>     | <a href="#">R275P3D</a>       | <b>Missense</b> | ShallowDel | 3      | <b>Medium</b>     | 0.35            | 941             |
| <a href="#">TCGA-78-7155-01</a>    | <a href="#">Lung adeno (TCGA)</a>     | <a href="#">E322*3D</a>       | <b>Nonsense</b> | Diploid    | 1      |                   | 0.27            | 1340            |
| <a href="#">TCGA-64-5775-01</a>    | <a href="#">Lung adeno (TCGA)</a>     | <a href="#">P343Q3D</a>       | <b>Missense</b> | ShallowDel | 3      | <b>Medium</b>     | 0.74            | 402             |
| <a href="#">TCGA-55-7907-01</a>    | <a href="#">Lung adeno (TCGA)</a>     | <a href="#">E353*3D</a>       | <b>Nonsense</b> | Diploid    | 1      |                   | 0.3             | 963             |
| <a href="#">TCGA-05-4410-01</a>    | <a href="#">Lung adeno (TCGA)</a>     | <a href="#">G354R3D</a>       | <b>Missense</b> | Diploid    | 1      | Neutral           | 0.22            | 982             |
| <a href="#">TCGA-05-4390-01</a>    | <a href="#">Lung adeno (TCGA)</a>     | <a href="#">W453L3D</a>       | <b>Missense</b> | ShallowDel | 1      | <b>Low</b>        | 0.16            | 495             |
| <a href="#">TCGA-66-2777-01</a>    | <a href="#">Lung squ (TCGA pub)</a>   | <a href="#">MUTATED</a>       | <b>Splice</b>   | Diploid    |        |                   | 0.16            | 165             |
| <a href="#">TCGA-18-3416-01</a>    | <a href="#">Lung squ (TCGA pub)</a>   | <a href="#">R97L</a>          | <b>Missense</b> | Gain       |        | <b>Low</b>        | 0.11            | 874             |
| <a href="#">TCGA-18-3409-01</a>    | <a href="#">Lung squ (TCGA pub)</a>   | <a href="#">P113S</a>         | <b>Missense</b> | Diploid    | 1      | <b>Medium</b>     | 0.27            | 2434            |
| <a href="#">TCGA-34-2608-01</a>    | <a href="#">Lung squ (TCGA pub)</a>   | <a href="#">V186B3D</a>       | <b>Missense</b> | Diploid    | 1      | <b>Medium</b>     | 0.07            | 116             |
| <a href="#">TCGA-21-1081-01</a>    | <a href="#">Lung squ (TCGA pub)</a>   | <a href="#">H200P3D</a>       | <b>Missense</b> | Diploid    | 1      | Neutral           | 0.28            | 171             |
| <a href="#">TCGA-21-5787-01</a>    | <a href="#">Lung squ (TCGA pub)</a>   | <a href="#">K211N3D</a>       | <b>Missense</b> | Diploid    | 1      | <b>Medium</b>     | 0.21            | 365             |
| <a href="#">TCGA-60-2713-01</a>    | <a href="#">Lung squ (TCGA pub)</a>   | <a href="#">I229F3D</a>       | <b>Missense</b> | Diploid    | 2      | <b>Medium</b>     | 0.04            | 202             |
| <a href="#">TCGA-66-2754-01</a>    | <a href="#">Lung squ (TCGA pub)</a>   | <a href="#">E300G3D</a>       | <b>Missense</b> | Diploid    | 1      | <b>Medium</b>     | 0.36            | 396             |
| <a href="#">TCGA-66-2757-01</a>    | <a href="#">Lung squ (TCGA pub)</a>   | <a href="#">Q347H3D</a>       | <b>Missense</b> | Gain       | 2      | <b>Low</b>        | 0.52            | 209             |
| <a href="#">TCGA-66-2763-01</a>    | <a href="#">Lung squ (TCGA pub)</a>   | <a href="#">A405P3D</a>       | <b>Missense</b> | ShallowDel | 1      | <b>Low</b>        | 0.43            | 332             |
| <a href="#">TCGA-18-3409-01</a>    | <a href="#">Lung squ (TCGA)</a>       | <a href="#">P113S</a>         | <b>Missense</b> | Diploid    | 1      | <b>Medium</b>     | 0.27            | 2505            |
| <a href="#">TCGA-66-2777-01</a>    | <a href="#">Lung squ (TCGA)</a>       | <a href="#">X138_splice</a>   | <b>Splice</b>   | Diploid    |        |                   | 0.16            | 166             |
| <a href="#">TCGA-34-2608-01</a>    | <a href="#">Lung squ (TCGA)</a>       | <a href="#">V186B3D</a>       | <b>Missense</b> | ShallowDel | 1      | <b>Medium</b>     | 0.07            | 132             |
| <a href="#">TCGA-21-1081-01</a>    | <a href="#">Lung squ (TCGA)</a>       | <a href="#">H200P3D</a>       | <b>Missense</b> | Diploid    | 1      | Neutral           | 0.28            | 171             |
| <a href="#">TCGA-21-5787-01</a>    | <a href="#">Lung squ (TCGA)</a>       | <a href="#">K211N3D</a>       | <b>Missense</b> | DeepDel    | 1      | <b>Medium</b>     | 0.21            | 359             |
| <a href="#">TCGA-60-2713-01</a>    | <a href="#">Lung squ (TCGA)</a>       | <a href="#">I229F3D</a>       | <b>Missense</b> | Diploid    | 2      | <b>Medium</b>     | 0.04            | 220             |
| <a href="#">TCGA-66-2754-01</a>    | <a href="#">Lung squ (TCGA)</a>       | <a href="#">E300G3D</a>       | <b>Missense</b> | ShallowDel | 1      | <b>Medium</b>     | 0.36            | 270             |
| <a href="#">TCGA-22-4593-01</a>    | <a href="#">Lung squ (TCGA)</a>       | <a href="#">D346N3D</a>       | <b>Missense</b> | Diploid    | 1      | <b>Low</b>        | 0.04            | 166             |
| <a href="#">TCGA-66-2757-01</a>    | <a href="#">Lung squ (TCGA)</a>       | <a href="#">Q347H3D</a>       | <b>Missense</b> | Gain       | 2      | <b>Low</b>        | 0.52            | 229             |
| <a href="#">TCGA-66-2763-01</a>    | <a href="#">Lung squ (TCGA)</a>       | <a href="#">A405P3D</a>       | <b>Missense</b> | ShallowDel | 1      | <b>Low</b>        | 0.43            | 359             |
| <a href="#">134430</a>             | <a href="#">Lung SC (JHU)</a>         | <a href="#">C95S</a>          | <b>Missense</b> | NA         | 1      |                   | NA              | 150             |
| <a href="#">2334201</a>            | <a href="#">Lung SC (JHU)</a>         | <a href="#">T222A3D</a>       | <b>Missense</b> | NA         | 2      |                   | NA              | 173             |
